# Supplementary material for: Effects of Artificial Tooth Brushing and Hydrothermal Aging on the Mechanical Properties and Color Stability of Dental 3D Printed and CAD/CAM Materials
Source: MDPI journal article supplement (doi:10.3390/ma14206207), 2021-10-19
Supplement: s1 [file s1]

**Supplementary Table S1.** Surface roughness (Ra, Rz) and surface waviness (Wa, Wz) in  $\mu\text{m}$  (data are mean and standard-deviation values) before and after artificial toothbrushing. A significant difference between before and after artificial toothbrushing is indicated by different lower-case letters ( $p < 0.05$ ).

|    |      | FMLB                   | NXT                    | PLC                    | PMMA                   | DFC                    | PICN      |
|----|------|------------------------|------------------------|------------------------|------------------------|------------------------|-----------|
| Ra | Pre  | 0.17±0.02 <sup>a</sup> | 0.16±0.03 <sup>a</sup> | 0.01±0.00 <sup>a</sup> | 0.02±0.01 <sup>a</sup> | 0.01±0.00 <sup>a</sup> | 0.03±0.01 |
|    | Post | 0.17±0.05 <sup>a</sup> | 0.18±0.02 <sup>b</sup> | 0.07±0.03 <sup>b</sup> | 0.08±0.05 <sup>b</sup> | 0.16±0.02 <sup>b</sup> | 0.04±0.01 |
| Rz | Pre  | 0.92±0.11 <sup>a</sup> | 0.83±0.13 <sup>a</sup> | 0.07±0.02 <sup>a</sup> | 0.19±0.06 <sup>a</sup> | 0.05±0.02 <sup>a</sup> | 0.22±0.08 |
|    | Post | 0.88±0.24 <sup>a</sup> | 0.89±0.07 <sup>b</sup> | 0.43±0.13 <sup>b</sup> | 0.43±0.23 <sup>b</sup> | 0.84±0.11 <sup>b</sup> | 0.29±0.04 |
| Wa | Pre  | 2.64±5.11 <sup>a</sup> | 2.85±2.95 <sup>a</sup> | 0.43±0.13 <sup>a</sup> | 0.43±0.23 <sup>a</sup> | 0.84±0.11 <sup>a</sup> | 0.29±0.04 |
|    | Post | 4.67±4.28 <sup>a</sup> | 4.04±3.05 <sup>a</sup> | 2.13±0.80 <sup>b</sup> | 8.67±4.03 <sup>b</sup> | 1.95±0.63 <sup>b</sup> | 0.44±0.13 |
| Wz | Pre  | 0.29±0.23 <sup>a</sup> | 0.38±0.10 <sup>a</sup> | 0.06±0.01 <sup>a</sup> | 0.08±0.02 <sup>a</sup> | 0.03±0.00 <sup>a</sup> | 0.14±0.04 |
|    | Post | 0.62±0.18 <sup>b</sup> | 0.49±0.08 <sup>b</sup> | 0.22±0.06 <sup>b</sup> | 1.30±0.58 <sup>b</sup> | 0.32±0.04 <sup>b</sup> | 0.44±0.13 |

**Supplementary Table S2.** Vickers hardness (data are mean and standard-deviation values) of six materials. A significant difference between materials is indicated by different upper-case letters, and a significant difference between before and after artificial toothbrushing is indicated by different lower-case letters ( $p < 0.05$ ).

|      | FMLB                    | NXT                     | PLC                     | PMMA                    | DFC                     | PICN                      |
|------|-------------------------|-------------------------|-------------------------|-------------------------|-------------------------|---------------------------|
| Pre  | 9.1±0.4 <sup>A,a</sup>  | 15.5±0.4 <sup>A,a</sup> | 16.5±0.9 <sup>A,a</sup> | 16.9±1.1 <sup>A,a</sup> | 94.1±6.3 <sup>B,a</sup> | 251.6±26.2 <sup>C,a</sup> |
| Post | 12.7±2.7 <sup>A,b</sup> | 16.1±6.1 <sup>A,b</sup> | 16.4±6.4 <sup>A,a</sup> | 16.3±6.3 <sup>A,a</sup> | 90.6±0.6 <sup>B,a</sup> | 235.5±22.8 <sup>C,a</sup> |

**Supplementary Table S3.** color difference results (data are mean and standard-deviation values) of six materials. A significant difference between materials is indicated by different lower-case letters ( $p < 0.05$ ).

|            | FMLB                 | NXT                   | PLC                  | PMMA                  | DFC                  | PICN                  |
|------------|----------------------|-----------------------|----------------------|-----------------------|----------------------|-----------------------|
| $\Delta E$ | 1.0±0.6 <sup>a</sup> | 1.6±0.6 <sup>ab</sup> | 1.2±0.2 <sup>a</sup> | 1.4±0.7 <sup>ab</sup> | 2.3±1.0 <sup>b</sup> | 1.4±0.6 <sup>ab</sup> |

**Supplementary Table S4.** Flexural strength results (data are mean and standard-deviation values) in MPa before and after toothbrushing. Significant differences ( $p < 0.05$ ) between materials and between before and after hydrothermal aging are indicated by different upper-case letters and different lower-case letters, respectively.

|      | FMLB                        | NXT                       | PLC                       | PMMA                     | DFC                        | PICN                      |
|------|-----------------------------|---------------------------|---------------------------|--------------------------|----------------------------|---------------------------|
| Pre  | 139.4±40.5 <sup>B,C,a</sup> | 163.9±14.0 <sup>C,b</sup> | 155.2±23.6 <sup>C,a</sup> | 108.0±8.1 <sup>A,b</sup> | 116.4±11.4 <sup>AB,b</sup> | 104.2±19.0 <sup>A,b</sup> |
| Post | 135.5±37.8 <sup>B,a</sup>   | 147.2±15.7 <sup>B,a</sup> | 147.1±38.3 <sup>B,a</sup> | 78.5±7.3 <sup>A,a</sup>  | 86.9±11.4 <sup>A,a</sup>   | 73.6±8.0 <sup>A,a</sup>   |
